# Supplementary material for: Biosynthesis of cannabinoid precursor olivetolic acid in genetically engineered Yarrowia lipolytica
Source: Springer Nature journal article supplement (doi:10.1038/s42003-022-04202-1), 2022-11-12

**Biosynthesis of cannabinoid precursor olivetolic acid in genetically  
engineered *Yarrowia lipolytica***

Jingbo Ma<sup>1,2</sup>, Yang Gu<sup>1,3</sup> and Peng Xu<sup>1,4\*</sup>

<sup>1</sup>Department of Chemical, Biochemical and Environmental Engineering, University of Maryland, Baltimore County, Baltimore, MD 21250, USA

<sup>2</sup>Present address: College of Biological and Pharmaceutical Engineering, West Anhui University, Lu'an, Anhui 237012, China

<sup>3</sup>Present address: School of Food Science and Pharmaceutical Engineering, Nanjing Normal University, Nanjing 210023, China

<sup>4</sup>Present address: Department of Chemical Engineering, Guangdong Provincial Key Laboratory of Materials and Technologies for Energy Conversion (MATEC), Guangdong Technion-Israel Institute of Technology, Shantou, Guangdong 515063, China

---

\* Corresponding authors Tel: + 86-0754-88077163. E-mail: [peng.xu@gtiit.edu.cn](mailto:peng.xu@gtiit.edu.cn) (PX).

**Supplementary Table 1. Primers used in this study**

| Primers          | Sequence                                                    |
|------------------|-------------------------------------------------------------|
| CsOAC-F          | ccgaccagcacttttgcagtactaaccgcaggccgtgaaacaccttattgtcctc     |
| CsOAC-R          | ggacaggccatggaactagtcggtaccttatttacgaggggtgtagtcgaaaataag   |
| CsOLS-F          | ccgaccagcacttttgcagtactaaccgcagaatcacctccgggcagaagg         |
| CsOLS-R          | ggacaggccatggaactagtcggtaccttaataacttaatggggacgcttc         |
| CsOAC-Gly-F      | ggaggagggtggtggtggtggtgaggtggcatggccgtgaaacaccttattgtcctc   |
| CsOLS-Gly-R      | acggccatgccacctccaccaccaccacctctccataacttaatggggacgcttct    |
| EcFadD-F         | ccgaccagcacttttgcagtactaaccgcagaagaaggttggcttaaccgttatcc    |
| EcFadD-R         | ggacaggccatggaactagtcggtacctcaggcttattgtccactttgccgcg       |
| EcFadK-F         | tccgaccagcacttttgcagtactaaccgcagcatccacaggcccgcattctcg      |
| EcFadK-R         | ggacaggccatggaactagtcggtaccttattcaatctcttcacagacatc         |
| ScFAA2-F         | tccgaccagcacttttgcagtactaaccgcaggccgctccagattatgcaactaccg   |
| ScFAA2-R         | ggacaggccatggaactagtcggtacctaaagcttttctgtcttgactag          |
| ylACC1-F         | tccgaccagcacttttgcagtactaaccgcagcagctgcaattgaggacactaacacg  |
| ylACC1-R         | ggacaggccatggaactagtcggtacctcacaaccccttgagcagctcagcccc      |
| ylACC1(S667A)-F  | agttagacctctgctgacggtggtatcc                                |
| ylACC1(S667A)-R  | aataccaccgtcagcaagaggtctaactc                               |
| ylACC1(S1178A)-F | gtctcgagctgatccgctcctccgacttttc                             |
| ylACC1(S1178A)-R | aagtcggagacggcatcagctcgagacac                               |
| ylFAA1-F         | ccgaccagcacttttgcagtactaaccgcaggtcgatacacaatttctcaaagcc     |
| ylFAA1-R         | ggacaggccatggaactagtcggtacctaaagactgctcgtagcactcatcaattc    |
| pTEF-Rvs         | ccggatggccagacaagaaca                                       |
| XPR2-Fw          | gtaaatagaaaatctggctttaggtggcaaat                            |
| Ku70_DwF         | gtccggagcggccgcGCATGCaagtcgacaCTAGGGAGGCACATCTAAACGAATAACG  |
| Ku70_DwR         | gttacatcctttatcagacatacctaggAGTGAACGACCAAGACTAAAGGGTG       |
| ku70_UpF         | ccctaaatttgatgaaagcctaggCGACTTGATGTTTAGAGGTGCCAGATCC        |
| ku70_UpR         | taatgtatgctatacgaagtattTTTCAAAAAGCGGCGGTTCTGTG              |
| ku70_ChkF        | GCCAAGTTCTCTTTCCCCTACATG                                    |
| ku70_ChkR        | CTTCAGTAACTGGGCCCACGC                                       |
| YliC05907-UpF    | tggcatccctaaatttgatgaaagcctaggACAGTTCTCTTCTCCTTGTTGAGATATAC |
| YliC05907-UpR    | acttcgtataatgtatgctatacgaagtattGGTGGAGTCATGTGAATTGAGCGCGGTG |
| YliC05907-DwF    | cgtccggagcggccgcGCATGCaagtcgacAGAGTATAGTAATGTATTATTTGCTTAGG |
| YliC05907-DwR    | cctatgtatcctttatcagacatacctaggCCGAACCAAGGAGATGATCAAGTCC     |
| YliC05907-ChkF   | ATTGCCGAGATTTCCGCAAAAACCTGAAG                               |
| YliC05907-ChkR   | AAGAACAAGACCGACAACCTGCCTGTTGG                               |
| YliDGA1_DwF      | gctagcgagacaataacggaggaGGA AAAACTGCCTGGGTTAGGCAAAT          |
| YliDGA1_DwR      | atcagacatagcggccgcTCTCTGATGGCCTGGAGCGAG                     |
| YliDGA1_UpF      | aatttgatgaaagcggccgcATGCTGCGGGCGGATCCTGG                    |
| YliDGA1_UpR      | tgtatgctatacgaagtattAGCTTTTGT TTTGTGTGACTTGTCTGT            |
| YliDGA1_ChkF     | GTTTATGCATTCTGTTGGACCTTAGTCTG                               |
| YliDGA1_ChkR     | GTTATCTACCACGATTTTTTGGTTTCTGAGGC                            |

|              |                                                             |
|--------------|-------------------------------------------------------------|
| YliDGA2_DwF  | gctagcgagacaataacggaggaCATAA CACTCATCAGTAGCCTTTACAGTGAT     |
| YliDGA2_DwR  | ccttttatcagacatagcggccgcTTGCTCTTGTAATTCCATAGATAATATATACGAAA |
| YliDGA2_UpF  | aaatttgatgaaaggcggccgcCTTGGGAGTGTATTTGGAAAATGACTTGG         |
| YliDGA2_UpR  | tgtatgctatacgaagtatTTTGCGGGCGGTACGGGTACA                    |
| YliDGA2_ChkF | CTATCGCCCCAAAGTGTCTTAGCA                                    |
| YliDGA2_ChkR | GAGATGGCATGCCAACGTTGAC                                      |
| yIPEX10-F    | tccgaccagcacttttgcagtactaaccgcagtggggaagttcacatgcattcgcctgg |
| yIPEX10-R    | ggacaggccatggaactagtcggtaccttactgataggcaacaagttctgctctc     |
| EcLpdA-F     | ccgaccagcacttttgcagtactaaccgcagagtactgaaatcaaaactcaggtc     |
| EcLpdA-R     | GGACAGGCCATGGA ACTAGTCGGTACCTTACTTCTTCTTCGCTTTCGGGT         |
| EcAceF-F     | ccgaccagcacttttgcagtactaaccgcaggctatcgaatcaaagtaccggac      |
| EcAceF-R     | GGACAGGCCATGGA ACTAGTCGGTACCTTACATCACCAGACGGCGAATGTC        |
| EcAceE-F     | ccgaccagcacttttgcagtactaaccgcagtcagaacgttcccaaatgacgtg      |
| EcAceE-R     | ggacaggccatggaactagtcggtaccttacgccagacgcggttaactt           |
| EcLplA-F     | ccgaccagcacttttgcagtactaaccgcagtcacattacgcctgctcatctc       |
| EcLplA-R     | GGACAGGCCATGGA ACTAGTCGGTACCCTACCTTACAGCCCCCGCCATCCATG      |
| yI MAE1-F    | ccgaccagcacttttgcagtactaaccgcagttacgactacgaacctgcgacc       |
| yI MAE1-R    | GGACAGGCCATGGA ACTAGTCGGTACCCTAGTCGTAATCCCGCACATGGATG       |
| yI ANT1-F    | tccgaccagcacttttgcagtactaaccgcaggcagctatttcaaagactatgttc    |
| yI ANT1-R    | ggacaggccatggaactagtcggtaccttacccttgatcaaggtggggccttcatg    |

---

**Supplementary Table 2. Plasmids used in this study**

| Plasmids                                                                 | Characteristics                                                                                   |
|--------------------------------------------------------------------------|---------------------------------------------------------------------------------------------------|
| pYLXP'                                                                   | pYaliA1 vector backbone with leucine marker and Ampicillin resistance gene                        |
| pYLXP'-CsOLS                                                             | pYLXP' containing gene CsOLS                                                                      |
| pYLXP'-CsOAC                                                             | pYLXP' containing gene CsOAC                                                                      |
| pYLXP'-CsOLS-CsOAC                                                       | pYLXP' containing gene CsOLS and CsOAC                                                            |
| pYLXP'-CsOLS-Gly-CsOAC                                                   | pYLXP' containing gene CsOLS and CsOAC with Glycine linker                                        |
| pYLXP'-CsOAC-Gly-CsOLS                                                   | pYLXP' containing gene CsOAC and CsOLS with Glycine linker                                        |
| pYLXP'-CsAAE1                                                            | pYLXP' containing gene CsAAE1                                                                     |
| pYLXP'-CsAAE3                                                            | pYLXP' containing gene CsAAE3                                                                     |
| pYLXP'-EcFadD                                                            | pYLXP' containing gene EcFadD                                                                     |
| pYLXP'-EcFadK                                                            | pYLXP' containing gene EcFadK                                                                     |
| pYLXP'-ScFAA2                                                            | pYLXP' containing gene ScFAA2                                                                     |
| pYLXP'-ylFAA1                                                            | pYLXP' containing gene ylFAA1                                                                     |
| pYLXP'-PpLvaE                                                            | pYLXP' containing gene PpLvaE                                                                     |
| pYLXP'-CsOLS-CsOAC-CsAAE1                                                | pYLXP' containing gene CsOLS, CsOAC and CsAAE1                                                    |
| pYLXP'-CsOLS-CsOAC-CsAAE3                                                | pYLXP' containing gene CsOLS, CsOAC and CsAAE3                                                    |
| pYLXP'-CsOLS-CsOAC-EcFadD                                                | pYLXP' containing gene CsOLS, CsOAC and EcFadD                                                    |
| pYLXP'-CsOLS-CsOAC-EcFadK                                                | pYLXP' containing gene CsOLS, CsOAC and EcFadK                                                    |
| pYLXP'-CsOLS-CsOAC-ScFAA2                                                | pYLXP' containing gene CsOLS, CsOAC and ScFAA2                                                    |
| pYLXP'-CsOLS-CsOAC-ylFAA1                                                | pYLXP' containing gene CsOLS, CsOAC and ylFAA1                                                    |
| pYLXP'-CsOLS-CsOAC-PpLvaE                                                | pYLXP' containing gene CsOLS, CsOAC and PpLvaE                                                    |
| pYLXP'-ylACC1                                                            | pYLXP' containing gene ylACC1                                                                     |
| pYLXP'-ylACC1 <sup>S667A</sup>                                           | pYLXP' containing gene ylACC1 <sup>S667A</sup>                                                    |
| pYLXP'-ylACC1 <sup>S667A,S1178A</sup>                                    | pYLXP' containing gene ylACC1 <sup>S667A,S1178A</sup>                                             |
| pYLXP'-CsOLS-CsOAC-PpLvaE-ylACC1                                         | pYLXP' containing gene CsOLS, CsOAC, PpLvaE and ylACC1                                            |
| pYLXP'-CsOLS-CsOAC-PpLvaE-ylACC1 <sup>S667A,S1178A</sup>                 | pYLXP' containing gene CsOLS, CsOAC, PpLvaE and ylACC1 <sup>S667A,S1178A</sup>                    |
| pYLXP'-ylPEX10                                                           | pYLXP' containing gene ylPEX10                                                                    |
| pYLXP'-SeACS <sup>L641P</sup>                                            | pYLXP' containing gene SeACS <sup>L641P</sup>                                                     |
| pYLXP'-EcPDH-EcLpIA                                                      | pYLXP' containing gene EcPDH and EcLpIA                                                           |
| pYLXP'-ylPEX10-SeACS <sup>L641P</sup> -EcPDH-EcLpIA                      | pYLXP' containing gene ylPEX10, SeACS <sup>L641P</sup> , EcPDH and EcLpIA                         |
| pYLXP'-ylMAE1-ylANT1-McMAE2                                              | pYLXP' containing gene ylMAE1, ylANT1 and McMAE2                                                  |
| pYLXP'-ylPEX10-SeACS <sup>L641P</sup> -EcPDH-EcLpIA-ylMAE1-ylANT1-McMAE2 | pYLXP' containing gene ylPEX10, SeACS <sup>L641P</sup> , EcPDH, EcLpIA, ylMAE1, ylANT1 and McMAE2 |
| pYLXP'-loxP-ura                                                          | pYLXP' containing the loxP-URA-loxP cassette                                                      |
| pYLXP'-loxP-hygr                                                         | pYLXP' containing the loxP-hygr-loxP cassette                                                     |
| pYLXP'-Cre                                                               | pYLXP' containing gene Cre                                                                        |
| pURLA                                                                    | <i>Ku70</i> site integration plasmid                                                              |
| pURLB                                                                    | <i>YALIOC05907g</i> site integration plasmid                                                      |

pYLXP'-loxP-ura-yIDGA2

pYLXP'-loxP-hygr-yIDGA1

pURLA-CsOLS-CsOAC-PpLvaE-yIACC1

pURLB-CsOLS-CsOAC-PpLvaE-yIACC1

pYLXP'-loxP-ura containing gene yIDGA2 deletion cassette

pYLXP'-loxP-hygr containing gene yIDGA1 deletion cassette

pURLA containing gene CsOLS, CsOAC, PpLvaE and yIACC1

pURLB containing gene CsOLS, CsOAC, PpLvaE and yIACC1

---

NOTE: Cs, *Cannabis sativa*; Ec, *Escherichia coli*; Sc, *Saccharomyces cerevisiae*; yl, *Yarrowia lipolytica*; Pp, *Pseudomonas putida* KT2440; Se, *Salmonella enterica*; Mc, *Mucor circinelloides*.

### Supplementary Table 3. Strains used in this study

| Strains | Characteristics                                                                                                                                                                             |
|---------|---------------------------------------------------------------------------------------------------------------------------------------------------------------------------------------------|
| po1g    | Wild-type strain W29 (ATCC20460) derivative; W29 $\Delta$ matA $\Delta$ xpr2-332 $\Delta$ xpr-2 $\Delta$ leu2-270 pBR platform                                                              |
| po1f    | po1g derivative; Further deletion of gene <i>ura</i> ; po1g $\Delta$ ura3                                                                                                                   |
| po1fk   | po1f derivative; Further deletion of gene <i>ku70</i> ; po1f $\Delta$ ku70::loxP                                                                                                            |
| YL100   | po1fk with the empty plasmid pYLXP'                                                                                                                                                         |
| YL101   | po1fk with plasmid pYLXP'-CsOLS-CsOAC                                                                                                                                                       |
| YL102   | po1fk with plasmid pYLXP'-CsOLS-Gly-CsOAC                                                                                                                                                   |
| YL103   | po1fk with plasmid pYLXP'-CsOAC-Gly-CsOLS                                                                                                                                                   |
| YL104   | po1fk with plasmid pYLXP'-CsOLS-CsOAC-CsAAE1                                                                                                                                                |
| YL105   | po1fk with plasmid pYLXP'-CsOLS-CsOAC-CsAAE3                                                                                                                                                |
| YL106   | po1fk with plasmid pYLXP'-CsOLS-CsOAC-EcFadD                                                                                                                                                |
| YL107   | po1fk with plasmid pYLXP'-CsOLS-CsOAC-EcFadK                                                                                                                                                |
| YL108   | po1fk with plasmid pYLXP'-CsOLS-CsOAC-ScFAA2                                                                                                                                                |
| YL109   | po1fk with plasmid pYLXP'-CsOLS-CsOAC-yIFAA1                                                                                                                                                |
| YL110   | po1fk with plasmid pYLXP'-CsOLS-CsOAC-PpLvaE                                                                                                                                                |
| YL111   | po1fk derivative; Further deletion of genes <i>yIDGA2</i> ; po1fk $\Delta$ yIDGA2::loxP                                                                                                     |
| YL112   | YL111 derivative; Further deletion of genes <i>yIDGA1</i> ; po1fk $\Delta$ yIDGA2 $\Delta$ yIDGA1::loxP                                                                                     |
| YL113   | YL111 with plasmid pYLXP'-CsOLS-CsOAC-PpLvaE                                                                                                                                                |
| YL114   | YL112 with plasmid pYLXP'-CsOLS-CsOAC-PpLvaE                                                                                                                                                |
| YL115   | po1fk with plasmid pYLXP'-CsOLS-CsOAC-PpLvaE-yIACC1                                                                                                                                         |
| YL116   | po1fk with plasmid pYLXP'-CsOLS-CsOAC-PpLvaE-yIACC1 <sup>S667A,S1178A</sup><br>po1fk derivative; Further integration of genes <i>CsOLS-CsOAC-PpLvaE-yIACC1</i> at <i>YALI0C05907g</i> site; |
| YL117   | po1fk <i>CsOLSCsOACPPpLvaEylACC1::loxP</i><br>po1fk derivative; Further integration of genes <i>CsOLS-CsOAC-PpLvaE-yIACC1</i> at <i>ku70</i> site; po1fk                                    |
| YL118   | <i>CsOLSCsOACPPpLvaEylACC1::loxP</i><br>po1fk derivative; Further integration of genes <i>CsOLS-CsOAC-PpLvaE-yIACC1</i> at pBR platform; po1fk                                              |
| YL119   | <i>CsOLSCsOACPPpLvaEylACC1::Leu</i>                                                                                                                                                         |
| YL120   | YL117 with the empty plasmid pYLXP'                                                                                                                                                         |
| YL121   | YL118 with the empty plasmid pYLXP'                                                                                                                                                         |
| YL122   | YL118 with plasmid pYLXP'-yIPEX10                                                                                                                                                           |
| YL123   | YL118 with plasmid pYLXP'-SeACS <sup>L641P</sup>                                                                                                                                            |
| YL124   | YL118 with plasmid pYLXP'-EcPDH-EcLpIA                                                                                                                                                      |
| YL125   | YL118 with plasmid pYLXP'-yIPEX10-SeACS <sup>L641P</sup> -EcPDH-EcLpIA                                                                                                                      |
| YL126   | YL118 with plasmid pYLXP'-yIIMAE1-yIANT1-McMAE2                                                                                                                                             |
| YL127   | YL118 with plasmid pYLXP'-yIPEX10-SeACS <sup>L641P</sup> -EcPDH-EcLpIA-yIIMAE1-yIANT1-McMAE2<br>YL118 derivative; Further integration of genes                                              |
| YL128   | yIPEX10-SeACS <sup>L641P</sup> -EcPDH-EcLpIA-yIIMAE1-yIANT1-McMAE2 at pBR platform; YL118<br>yIPEX10SeACS <sup>L641P</sup> ECPDHEcLpIAyIIMAE1yIANT1McMAE2::Leu                              |

## Supplementary Note 1: Codon-Optimized gene sequences

>CsOLS

atgaatcacctccgggcagaaggccccgcatccgtcctggctatcggactgcaaatcccgaaaacatccttccaagacgagttccccgattat  
tattccgagtcaccaagtctgagcacaatgactcaactcaaggagaaattccggaagatttgacaaaagcatgatccgtaagcggaaactgttcc  
tgaatgaagagcacctgaagcagaatcctcgaactgttgaacacgagatgcagacccttgatgcacgtcaggacatgcttggagggttccca  
agctgggtaaagatgctgtgccaaggctatcaaggagtgggccagcctaaatgaagatcacgcatctgattttcacctctgctcacaactg  
atatgcccggagctgattatcactgtgcaaaactgctcggctgagccctctgtcaaacggggtatgatgtaccagctgggtgctacggcgggtg  
aacggtgctgcgtatcgaaaggatattgccgaaaatacaaaaggcggcagagtccttgctgtgtgtgacattatggcctgtcttccgggga  
ccctccgaatccgatctgaactgcttgcggacaagcaatgttgatggcgcagccgcttgcgttggtgcagagcctgatgaatctgtgg  
gtgaaagaccattttcagctcgtctcagaggtcaactatcctgcccaatcggagggcacaattggtggacatattcgtgaagcaggactga  
tttcgacctgcacaaagatgttctatgcttcccaataacatcgagaaatgccttaccgagcctttaccctatcggcattcggattggaattc  
atgttttgatcacccatcccggaggaaaagcaatcctcgataaagtggagaaaaacttcacctcaagtccgataagttcgtggactcccggcatg  
tctctctgaacatggaaatgtcgtcctcactgtcctttcgtgatggacgaactcgggaagcggcctcaggaaggcaaaagcacaacag  
gtgacggattgaatgggggttctcttggccttggccttgacgggtgaacgagtcgttggtagaagcgtccccattaagtattaa

>CsOAC

atggcctgaaacaccttattgtcctcaaattcaaggacgaaatcactgaggcacagaaggaggaatttttaaactacgtcaatctcgtcaatat  
cattcctgctatgaaggatgtctattggggcaaagatgtgacccaaaaaacaaggaagaaggatacaccacattgtcaggttacattcagaga  
gcggtgaaacgattcaagactacatcattcaccggctcagttgcttggtagctttaccgatccttttgggaaaagctcctattttcgactacac  
ccctcgtaaa

>CsAAE1

atgggaaagaactacaagtcgcttgattccgtggcgcctcggattttatcgtctgggtattacatcggaagtcgctgagactcttcatggccggct  
cgcagaaattgttgtaactatggagctgccacgcctcagactggatcaacattgtaatcacattctccccgacctccttctcctgcatcaa  
atgctctctatggctgctacaaggattcggctcctgcacctcctgcttggattcctgatcctgagaaagttaaatctactaacctcggccttctgg  
agaaacgtgtaagaattcctgggtgtgaaatacaaggacctatttcgtcctttctcactccaagagtctcctcgaatcctgaggtctattg  
gcgtacggctcttattgatgagatgaagatttcttttccaaagatcctgagtgcttctcctcgcagacgacattaataaccccgggtggtccgaatg  
gcttctcgtggtatctcaattccgtaaaaatgcctcaatgtaactccaataaaaagctgaatgatacagatgatcgttggcgagacgaaggca  
atgacgacctgccccftaacaactcactctcagaccgtgcgaaaacgagctggtgcttgggtctacgcccttgaagagatgggtctcgaaaaa  
ggatgtgccatcgtattgacatgccatgcatgttgacccgtggtgatctacctcgaattgttctgctggatcgtggtgagcatcggcga  
cagcttttcggcaccgagattgacgcggctcagactctcgaagccaaagctatctcaccgaagatcatattatccgaggcaaaaacggat  
ccctctctatcgcgtgtggcgaagcaaaaagccccatggccatcgttattcctgttctggctccaacatcggcgcagagcttagagacggcgt  
atctcctgggactacttctcagagagctaaaggatttaagaactgtgaattcactgcagagagcagcccgtcgtgcttacaccaacatcctgt  
ttagctctggcaccactggtgaacctaaaggcaatccctggaccaagctacaccttaaggctgcagcagatggtggtcgcactcgcacatcc  
gaaagggcagatgtatcgtggtcctactaaccttggctggatgatggctcctggctcgtctatgcctctctgctcaacgggtccagcatcgcctt  
tataacggtagcccccttctcggcttcgaaaagtgtgcaagatgcaaggttacaatgcttgggtcgtccttctattgttagaagctggaaa  
agcacaattgcgttccggctacgactggtctactattcggctttagcagctcgggtgaagctcgaatgtgatgaatacctctggctgatgg  
gtagagcaaaatacaacctgcttattgagatgtgtggcggaccgagatcggaggagcctctcggctggatccttctcaagctcaatcccttag  
ctcttttctcgcagtgatgggtgtacgctgtatattctgataaaaatggataccatgcctaaaaacaacctggattggagagcttgccttgc  
gcctgtatgttcggcgttcgaaaacacttctgaacggcaaccaccacgacttatttcaagggtatgccacgctcaacgggtgaagctcttcg  
acgtcatggcagatatttgaactgacaagcaacggatactatgctcatggtagagccgatgacacgatgaacattggtggaatcaagatctct  
tccatcagagattgaacgggtctgaacgaagttgacaccgtgtctcgaacgacggccattggagtgcctccttgggtggtcctcagcag

ctcgttatttttctgttctcaaggattctaatagatacaactatcgacctgaaccagctcgggctgtctttcaatcttggactgcaaaaaagctcaatcc  
cttttcaaagtcacgcgtgtggtgcctctctctcgtcgtcctcggactgccaccaataaaattatcgggcgggtgctccgacagcagtttccattt  
cgagtaa

>CsAAE3

atggagaagagcgggtatggacgggatggaatctatcgttctctcgtcccccttcatctgcctaataacaataacctgagcatggtgtcgttct  
cttccgaaactcctcttctctatcctcagaacccgcacttctcgtctgagacgaatcaaatcttcttcttccacttcaagtccacagtcataaag  
tctcgcacggatttctaaccttgaattaagaagaacgatgtcgttctgattatgccctaattcgaaccacttccccgttcttctcggattattgc  
atcgggcgctattgccaccagtcctaatctctctatactgtcagcgaacttctaagcaggtgaaggactcgaactcctaaactattatcacggtgc  
cccaactcctcgaaaagggtgaaaggattcaatctcctaccattctcattggccctgattcggaaacaggaatccagcagcgataaggatgacatt  
taatgacctgftaaccttgggtggtcttccggctctgaatttccattgtggatgattcaacaatctgacacggccgacctcttactcagcggga  
acaaccggatgtcgaaggcgtcgttctcagcacaagaatttcatcgaagctcttattggttaccatggagcaagacctggtcggtgaaatg  
gacaacgttttcttcttcttccatgttccacgtttcggctcgtctattacttacgccaactcagcgtggaaataccgtcatttctatggccag  
atgtgatcttgaagatgctcaaggatgttgaagtagaaggtgactcacctcgggtcgttctcccgtgatccttgccttcttaagaatagcat  
ggttaaaaagttaaccttctagcattaaatatacggtagcggcgtcgcaccttggcaaggaccttatggaggaatgcagcaaaagtcgtccct  
atggaatcgtggtcgaaggatggtatgacctgagacttgcggattgtctctatggaagatattcaggtggaacaggaattctggtagcgcag  
gcatgctcgttccggaggtgaggtcaaatgttccggtgataccctgaagcctctcctcctaccagctcggagaaattgggtgaaaggacc  
caacatgatgcaaggatactcaacaaccctcaggcaactaagctgacaattgacaagaaagggtgggtgcataccggagatctgggctacttga  
cgaggacggacatctctacgtcgttgcgaatcaaggaactcacaatacaagggttccaagtcgcaccgctgagctcgaaggactgctgg  
tcagccacctgagattctggacgtcgtcattcccttcccgatgcagaagccggagaggttctgttgcctacgtggctcagatcggccaactc  
gtcctgactgaaaatgatgtcaagaaattatcgtcggccaagtcgctctttaaagcggctcgcgaaaggctacttcaaacagcgttctaaag  
cgcttctgaaaaattctttaa

>PpLvaE

atgatggtgccacgctttagcatgagctggctcctaaccagggtaaccacgtccctctcagcccccttctgttctgaagcgagcagcacaagt  
gtatcctcaacgggatgctgtcatctacggtgcaagacgatactcgtatcgtcagcttcatgaacgttctcagctcttcttggctctttagcgggt  
ggcgtccagcctggagagcgtgtcgtatcctggcccccaacttctgaaatgctggaagccattatggcgtgccccggagccggtgcagt  
ctcgtctgtatcaatccgtctttagggccggtctattgccttcatctccggcactgtgcagcaaaagctcatttgcaccgtgagttggtgct  
gttgcfaatcaggcactcgtatgctggacgcacctcccctgctggctggaatcagcagcaccagctgaacgggcccgtctggcacacgatc  
tcgactatgaagccttcttgcacagggagatcctgcagctcctgtctgcccccaaacgagtggtcagctatcgccttaactatacttccgg  
aacaacaggtgatccaaaggagctgttctgcaccaccgtggagcatacttaacgcctgtgctggtgcctcatttccaactgggccccggtc  
tgtgtatctgtggacttccatgttccattgcaacggatggtctcacttgggctgtgactctctcgggcggtacgcaggttcttgcgaaagggtg  
caacctgacgcaatcaatgccgcatgctgaacacgcagttaccatctgtcggccgacccgctcgtatgctcattcaccgagca  
cgcatcggcactcccgttctgtgtcgtgattacgggaggagctccccccctcggcgtcattgctgcaatggaagcaggggctttaaatt  
actcacgcttacggaatgacagagctgtaggacctcgtctcctgtggcagcctggtgtcagcagctgcccctggaagccagagccca  
gtttatgtcagacagggtgtcgtcaccctcctcgaagaagccaccgtgtcgcacacggatacgggacgacctcctgagacggcctg  
actctcgggtgaactgttctcgtggaacacagctcatgaaaggatactccataatcccgaagcaactcgtgcagcctcgtaacggttggctg  
cacagggcgatctcggcgtcctatctcgtggtatgttgaatgaagatagagcaaaagatattatcctcgggaggtgagaatatttctc  
gtcagatcgaagaggttctgtaccagcaccggaggtggtcagagctcgttggggcgagacgcccc  
cgcttctcaccctcagagccgacgcactggttccgggtgacgatctcgtgagatggtgtagagaacgactggccccatttaaagctcctcggca  
cgtgtctcgtgctgatcttctaaacagccaccggaaaaatccaaaattgtcctcctggaatgggcacgacagcaagaggcacagatcgcag  
atgctgagcattaa

>SeACS<sup>L641P</sup>

atgagccaaactcacaagcatgcaatccccgccaacattgccgaccgttgcctcattaaccctgaacagtacgaaactaagtacaaacaatccatc  
aacgatcctgataccttttggggagagcagggtaaaattctggattggattacacctatcagaaaagtaaaaafacatctttgccctggcaatgct  
tccatcaaatggtatgaagacggcacccctgaatctggctgctaattgtcttgaccgacacctgcaagaaaacggagatcggactgctattattggg  
aaggagatgacacgagccagtccaagcatatctcgtatcgggagctgcatcgagacgtgtgctggttccaatactctctcgaacttgaatta  
aaaaaggatgatggtggccatctatatgcctatggtcctgaggccgctgtggctatgctggcctgtgccgattggtgctgtgcatagcgtcatt  
ttggaggcttctcgcctgaggcagctgcaggacggatcattgattcctcctccggctggtgatcactgcagacgaaggagtccgggctggacg  
atctattcccctgaagaagaatgtggacgacgactcaagaaccctaacgtgacctctgttgagcatgtatcgtgctgaaacgaacaggctctga  
tattgattggcaagaggacgtgatctgtggtggcgtgacctgattgaaaaagcatcgccgagcacaacctgaggcaatgaatgcagaagac  
cccctgttcacctgtacacctcgggatctacaggtaaacccaaggcgtgctccataccacgggtggatacctgtctacgccgaactacgttca  
agtacgtgtttgactatcatcccggagacattactggtgtacagctgatgttgatgggttacaggtcattcctatctctgtacggccctctcgtt  
ggcgcaactacacttatgtttgaggggttcttaattggcccacacctgctcgaatgtgccaggtgggtgataaacaccaagtgaacattctgtaca  
cagccccacagccatccggggccctcatggccgaaggcgacaaagctatcaggggtacggaccgatcttcgctccggatccttggctctgttgg  
agagcctatcaatcctgaagcttgggagtggtattggaagaagattggcaaggagaagtccccgtggtgacacatggtggcagacggagac  
gggaggattcatgatccccctcctccggagccatcgaactgaaagccggaagcgaactcgtccctttttggcgttcaaccgcccttgtgga  
caacgaggacacccccaggaggcgtacagaagtaacttgttatcacagactcctggcccggacaggtcgaacactctttggcgtacac  
gaacggtttgagcaaacctactcagcacatttaaaacatgtactttccggagatggtgcacggcgggacgaagacggctactactggattacg  
ggaagagttgatgatgttcaacgtctctgccaccgacttggaaacggcagaaatcgaatctgccctcgtcggccatcctaaagattgccgaagcc  
gcagttgtcggaaatccccacgccatcaaaagtcagccatctacgcttacgtactcacaacctggtgaagaacctagccccgagctgtacgc  
cgaggtcagaaactgggttcgaaaggaaattggtcctcttgcaacgcctgatgtccttcattggactgattccctgcctaaaaccggagcggaaa  
gattatgcgacgaatcctcggaaagatccgctggtgacacgtcgaacctcggcgatacctctacactggccgacccccggagtggctgaaaaa  
cctcttgaggagaaacaagcaatcgaatgccctcctaa

>McMAE2

atgtcggccatcatcgatttctgacgtcagcttagctctacaaaacttcacaggaacagcaaacgccactacgaacgatctcgtcgcggtt  
ccggatatcttaacgagggcaaatatgaagttcggcttaactgcatcaacgctggttcttcaaaaaaactcaactatcggactgcaatggac  
cctgctaaactcaagacttggcctgaatggtcttctccccgccggtgctgaaaccttgaaatcagaagccccgagccctgcgtgctcctgcgtt  
ccaaacacaatctcctcgagaaatattcttatggcccaactcgttacaacgaacgttcggcttttctataagattgtattgacgaactcgaacgg  
tgcaacttccccgtcatttactcccaccgctcggaaaccgcttctgtgagatagcactatctaccctttctcgcagcactggtgttcccgatg  
gactttacctcacaagggcagagctccccgaactgtccagacaatccgtaactacagaccactgacactgaaggtttgagcccagattgcc  
gttatcagcagcgggtctcggatcctgggtcttggcgacctgggcaccaacggatgggtattcctatgggtaaacctcaactgtacgtggccggc  
gctggaatcgaacctcagctacactccccatcattctcgaacttggtaaccaataatgaaaaactgctcaacgatgagtttatatcggccttcggca  
gaaaagacctaatacgaagagtttaccagacagttgataccgtgcttactgcctccatactgtgtatcccaacctcctcattcagttcaggact  
ggctcgcggaacacgattcggccttctggagaataaccagaatcaaatgctttgcttcaacgacgatatccaaggtacaggagccgtgatcctgt  
ccggtgtcatcaacgcaatcggaaagtcgaaaaggagaatcaggtttcggccagagaccaccgtattgtcttttacggagcaggtctcgcggc  
atcggcgttctcgtcagatccagctctatttccagatcgaacacaacatgacggaggaagaggcaaacgctgttctggatcgtcattctaaa  
ggcctcgtcaccacaacacgtggtgataagctggctcagcataaagtctactacgctagaggcgataacgagggacaacagtataaagactga  
tcgacattgttaactataacctttatagcctcattggactcagcagcagactggtgcatttaatacgcaggttctggaacgacttctccctaatga  
gcagcccattgttttctctgagcaatcctgcaacgcaggctgagtgatcttgaacaggtatggaggctaccaataataaggttatctttgccag  
cggaacagctttccccgcttatacattaaactacaggagaggtgaatacggcggcaaggaataacatgtacattttccggccttggctcgc  
gcgcatgccttgcataatcctgcacactcagaccgtatgatctcagaagcctcaaacgactcgcagattccctgacagaagaagaatagcaag

cttggctctatccttctctcaactatcggagcgttccgctatcgtcgccgccgagttgccaagagactctgaacgaaaatctgccacctccaa  
gctatgatgacacaatgtaaatecatgaggatattcttgactatgttagcgtcacatgtggagccctgattacggaaataataattccaaccagca  
agccgtaagtaa

# Olivetolic Acid by LC-MS/MS

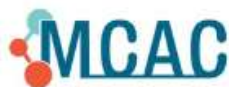

For: Jingbo Ma (CBEE)  
January 7, 2020

Report prepared by: M. LaCourse

Report reviewed by: Joshua Wilhide

Date: January 7, 2020

Date:

## Objective & Solution Preparation

- The goal of this analysis is to utilize LC-MS/MS to determine the olivetolic acid concentration in 3 samples
- Sample and standard preparation:
  - Samples were analyzed as provided by transferring to autosampler vials
    - Sample 3 was non-homogenous and thus vortexed thoroughly before analysis but still separated quickly
  - A standard curve was created in methanol from the provided 10 ppm stock following the scheme below:

| C1 (ppb) | V1 (uL) | C2 (ppb) | V2 (uL) | Diluent (uL) |
|----------|---------|----------|---------|--------------|
| 10,000   | 150     | 1000     | 1500    | 1350         |
| 10,000   | 50      | 500      | 1000    | 950          |
| 1,000    | 250     | 250      | 1000    | 750          |
| 1,000    | 100     | 100      | 1000    | 900          |
| 1,000    | 50      | 50       | 1000    | 950          |
| 1,000    | 10      | 10       | 1000    | 990          |

# Instrumentation & Method

## Instrumentation:

- Qsight LX50:
  - PerkinElmer UHPLC Precision Sampling Module
  - Perkin Elmer UHPLC Solvent Delivery Module
  - PerkinElmer UHPLC Column Temperature Module
- Perkin Elmer QSight 210 Mass Spectrometer
- Column: Agilent Zorbax Eclipse XDB-C18 2.1 x 50 mm, 1.8  $\mu$ m (P/N 981757-902)

## HPLC Method: Olivetolic Acid V1

- Injection Volume: 10.0  $\mu$ L
- Column Temperature: 40°C
- Run time: 5.00 min
- Flow: 0.3 mL/min
- Isocratic: (40:60 water:methanol)

## MS Method: Olivetolic Acid V1

- Drying Gas: 80.0
- HSID Temperature (°C): 320.0
- Nebulizer Gas 1: 100.0
- ElectroSpray V1 Pos: -3000.0
- Source 1 Temperature (°C): 200.0

## Olivetolic Acid (negative mode)

- Q1 Mass: 223.5
- Q2 Mass: 180
- Dwell Time: 795 ms
- Resolution (Q1:Q2): Unit\_Unit
- CE: 22, EV:-30, CCL2: 20

## Calibration Curve

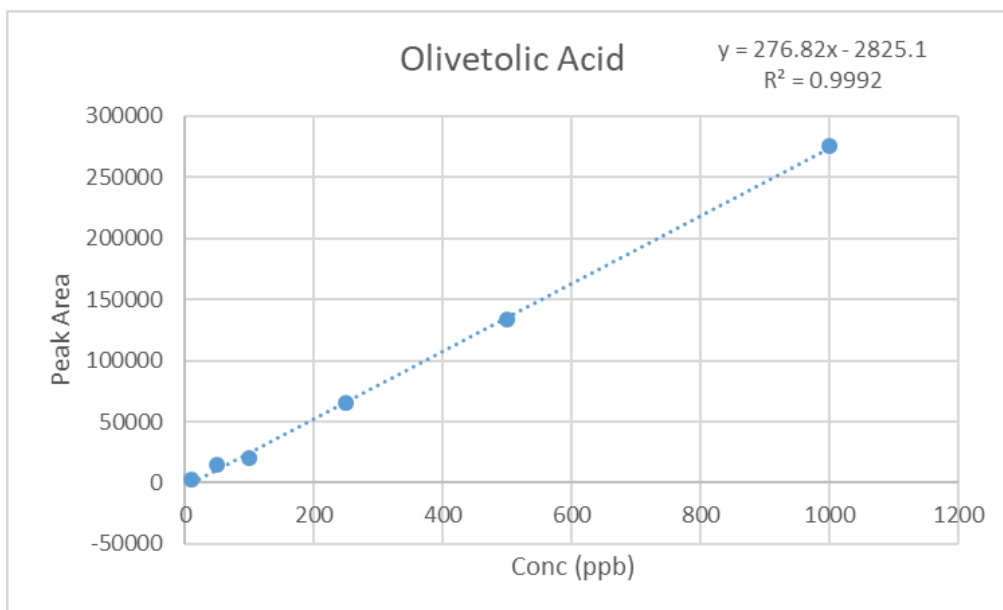

## Methanol Blank

2020-01-07: Methanol Blank\_112841  
EIC -MRM 223.50/180.00 (1 pair) EV: -30 V CC: 22 V Exp "Experiment 1" OlivetolicAcid

Number of Scans: 375  
Max: 5.66E+1 cps

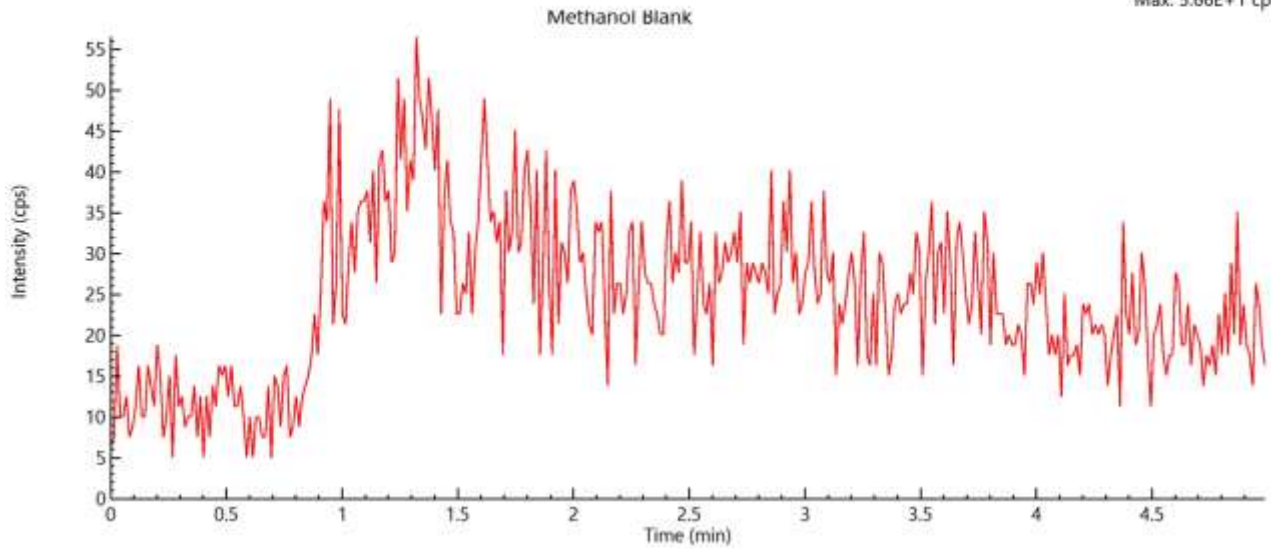

## 500 ppb Olivetolic Acid Standard

2020-01-07: 500 ppb Olivetolic Acid Standard\_111728  
EIC -MRM 223.50/180.00 (1 pair) EV: -30 V CC: 22 V Exp "Experiment 1" OlivetolicAcid

Number of Scans: 375  
Max: 6.27E+3 cps

Smoothing Level: 1

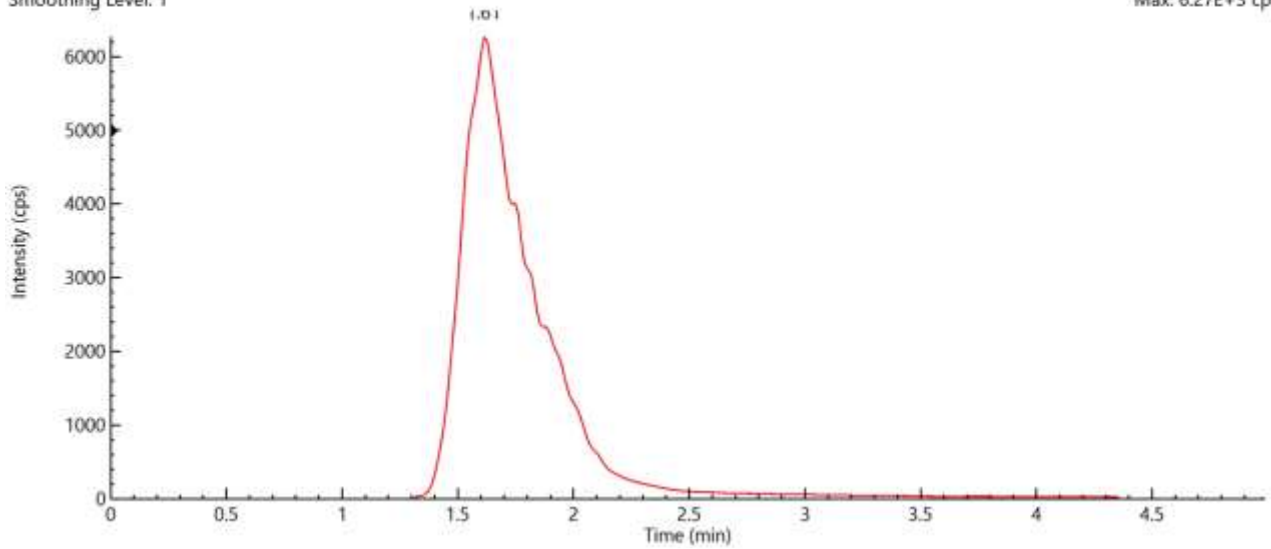

## Sample 1

2020-01-07: Sample 1\_113417  
EIC -MRM 223.50/180.00 (1 pair) EV: -30 V CC: 22 V Exp "Experiment 1" OlivetolicAcid

Number of Scans: 375  
Max: 4.76E+3 cps

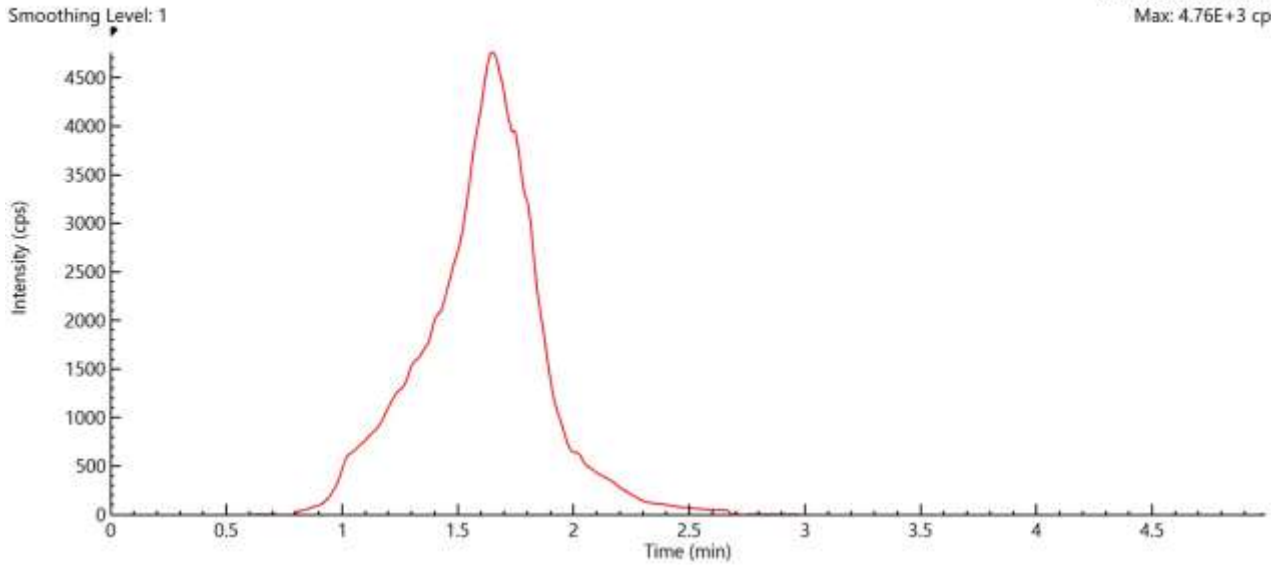

## Sample 2

2020-01-07: Sample 2\_115104  
EIC -MRM 223.50/180.00 (1 pair) EV: -30 V CC: 22 V Exp "Experiment 1" OlivetolicAcid

Number of Scans: 375  
Max: 6.17E+3 cps

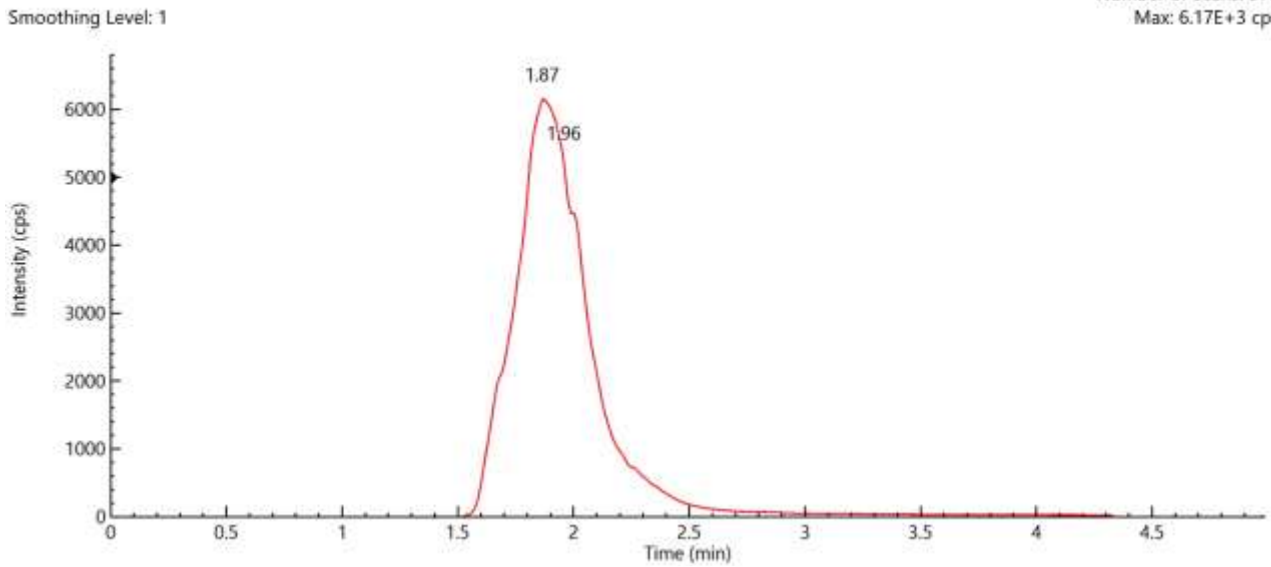

## Sample 3

2020-01-07: Sample 3\_120752  
EIC -MRM 223.50/180.00 (1 pair) EV: -30 V CC: 22 V Exp "Experiment 1" OlivetolicAcid

Number of Scans: 375  
Max: 6.34E+3 cps

Smoothing Level: 1

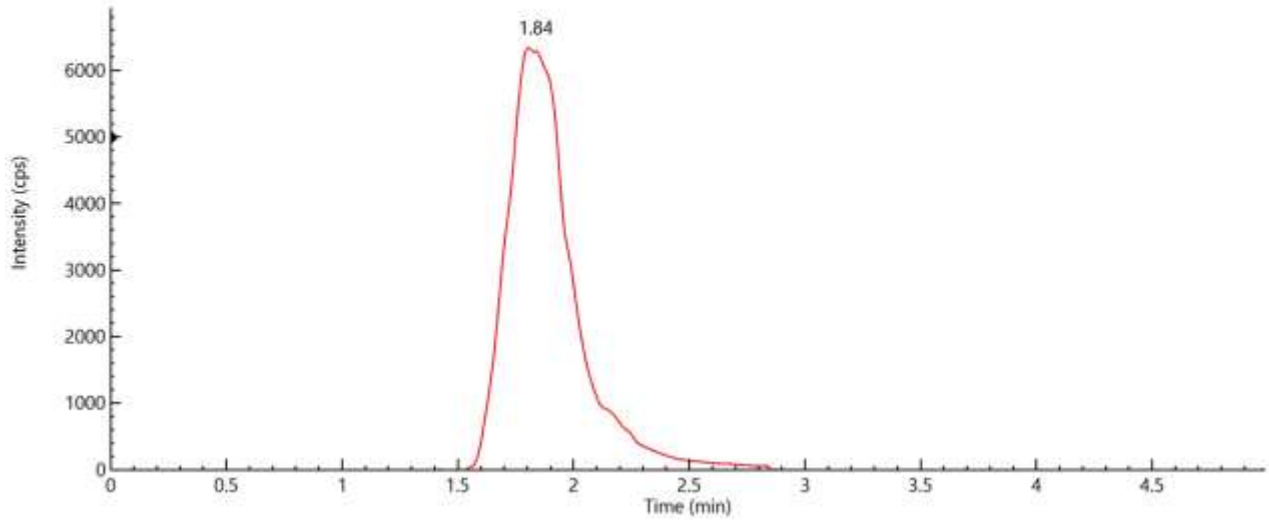

## Results

- See corresponding spreadsheet for all raw values and calculations
- Determined concentrations:
  - Sample 1: 649 ppb
  - Sample 2: 533 ppb
  - Sample 3: 467 ppb

## Olivetolic Acid by MS/MS

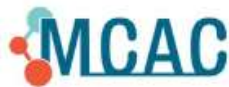

For: Jingbo Ma (CBEE)  
January 14, 2020

Report prepared by: M. LaCourse

Report reviewed by: Joshua Wilhide

Date: January 14, 2020

Date:

# Instrumentation & Method

## Instrumentation:

- Perkin Elmer QSight 210 Mass Spectrometer

## MS Method:

- Drying Gas: 80.0
- HSID Temperature (°C): 320.0
- Nebulizer Gas 1: 100.0
- ElectroSpray V1 Pos: -3000.0
- Source 1 Temperature (°C): 0.0

## Olivetolic Acid (negative mode)

- CE: 22
- Fragmentation:
  - EV:- 30
  - CCL2: 20

Mass Spectrum 1 ppm Olivetolic Acid

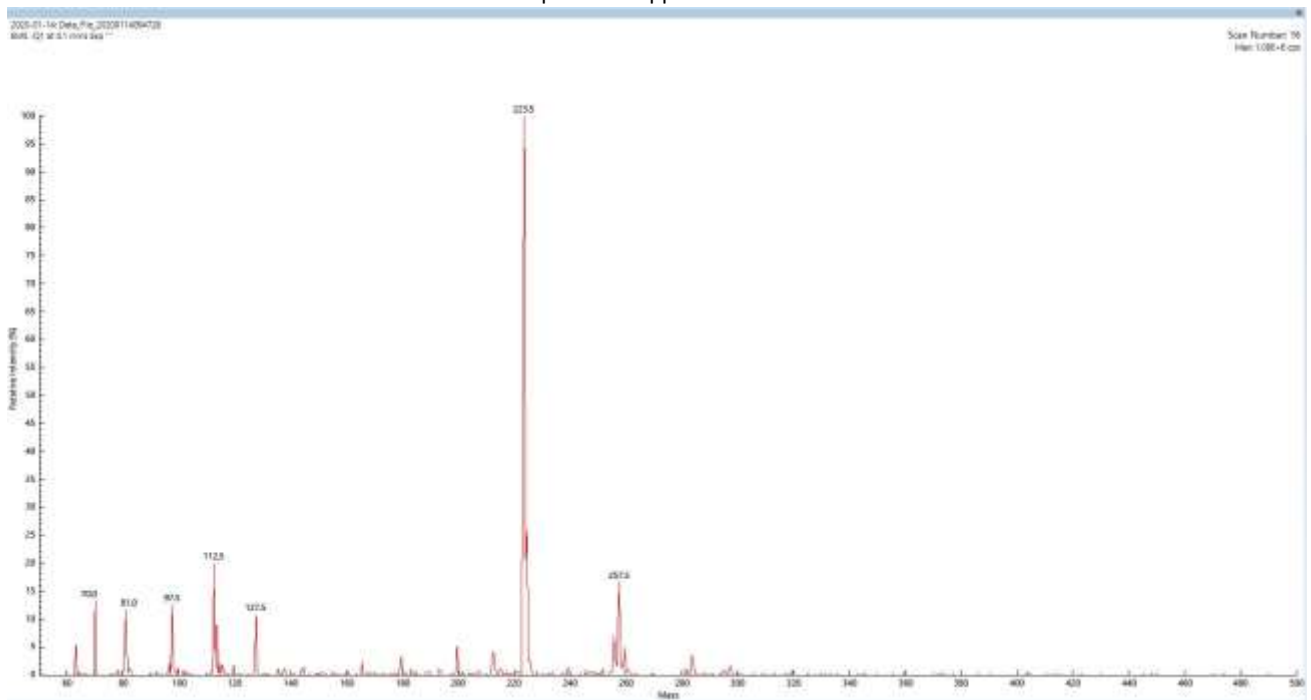

## Mass Spectrum 1 ppm Olivetolic Acid - Fragmentation

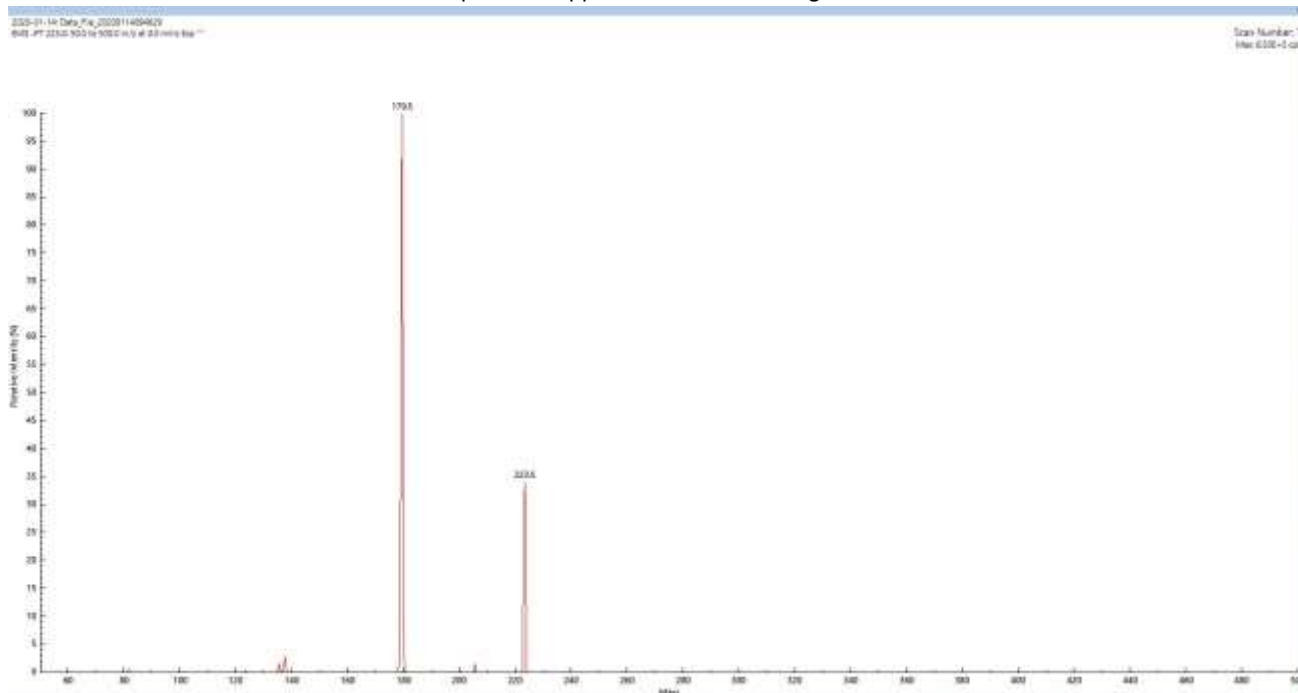

## Olivetolic Acid by High Resolution Mass Spectrometry (HRMS)

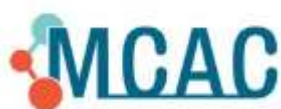

For: Jingbo Ma (CBEE)  
January 15, 2020

Report prepared by: M. LaCourse

Report reviewed by: Joshua Wilhide

Date: January 15, 2020

Date:

# Instrumentation & Method

## Instrumentation:

- Bruker 12T solariX FT-ICR-MS

## MS Method:

- Negative mode ESI ionization
- Fragmentation with collision energy 12V

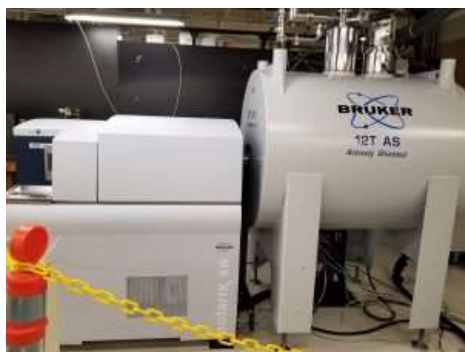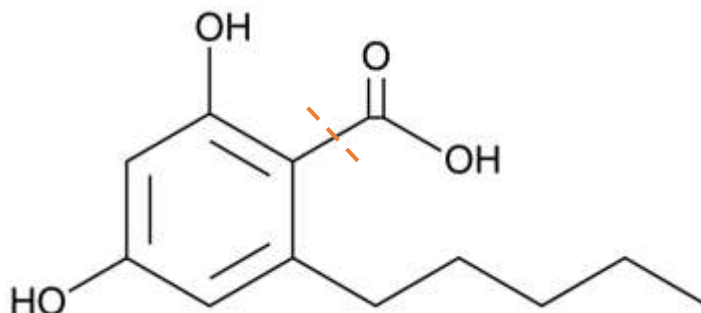

## Fragmentation

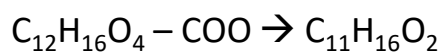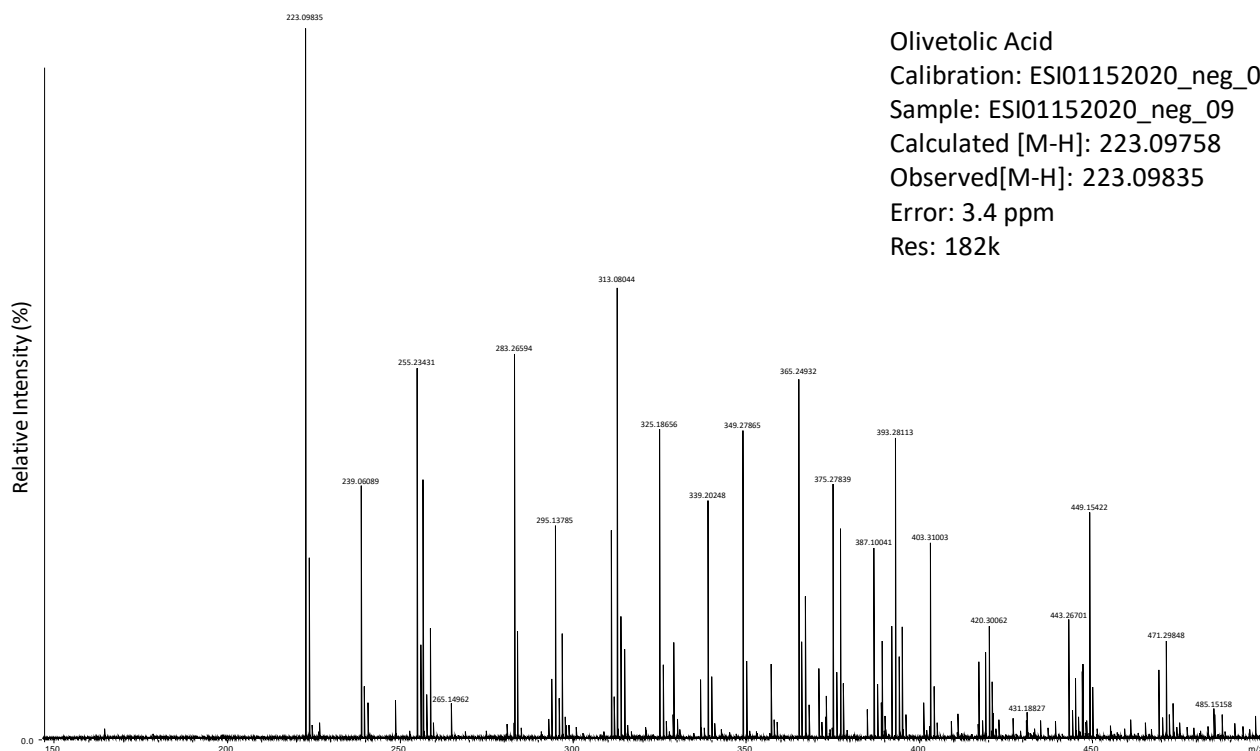

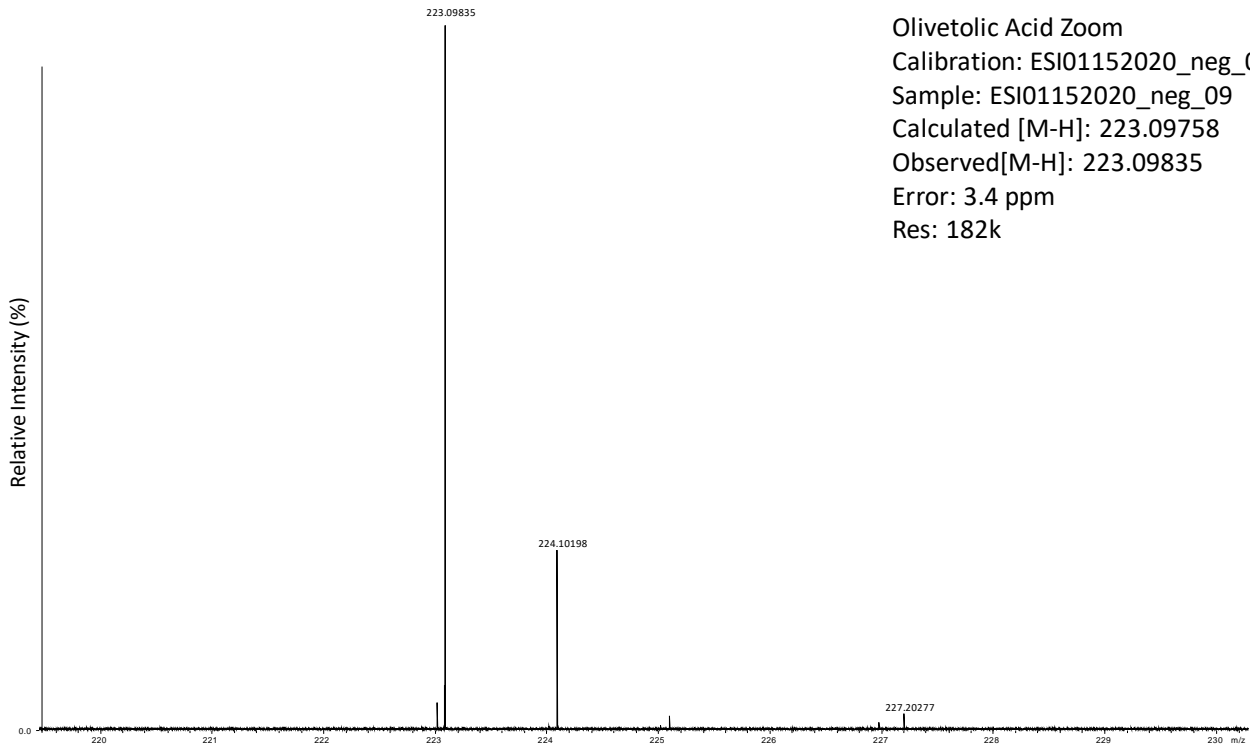

Olivetolic Acid Zoom  
Calibration: ESI01152020\_neg\_08  
Sample: ESI01152020\_neg\_09  
Calculated [M-H]: 223.09758  
Observed[M-H]: 223.09835  
Error: 3.4 ppm  
Res: 182k

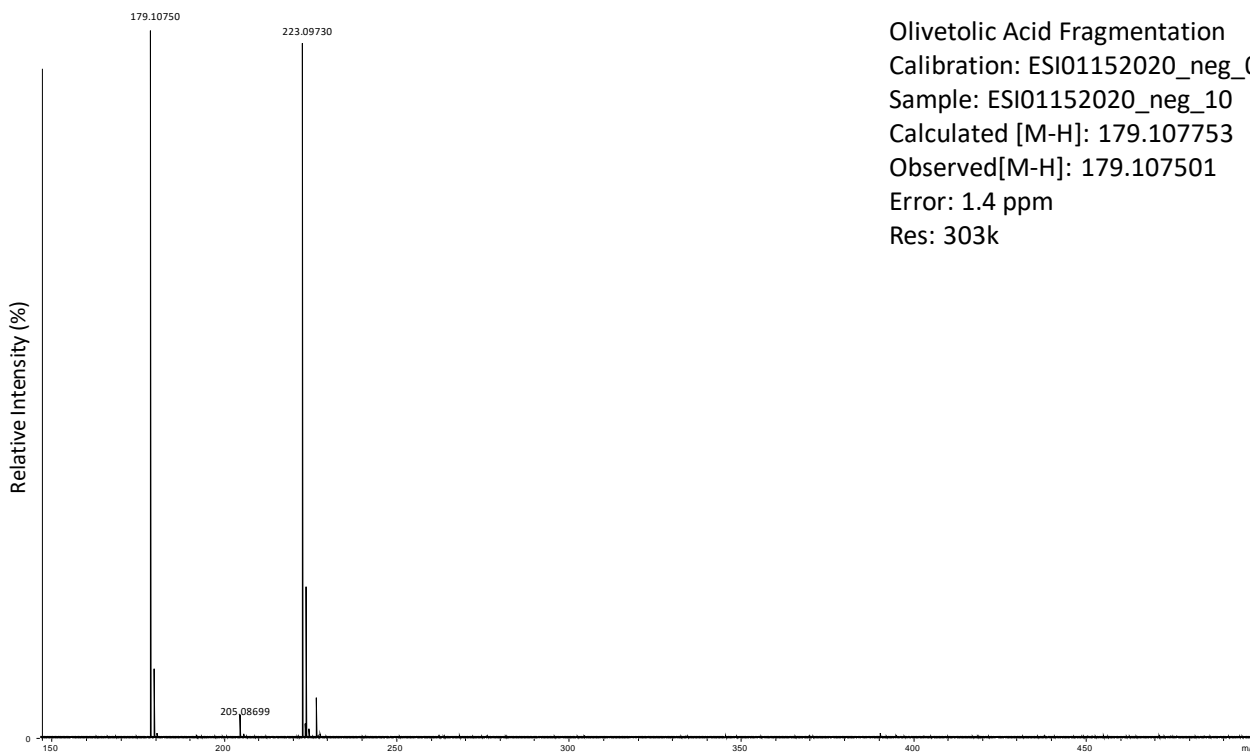

Olivetolic Acid Fragmentation  
Calibration: ESI01152020\_neg\_08  
Sample: ESI01152020\_neg\_10  
Calculated [M-H]: 179.107753  
Observed[M-H]: 179.107501  
Error: 1.4 ppm  
Res: 303k

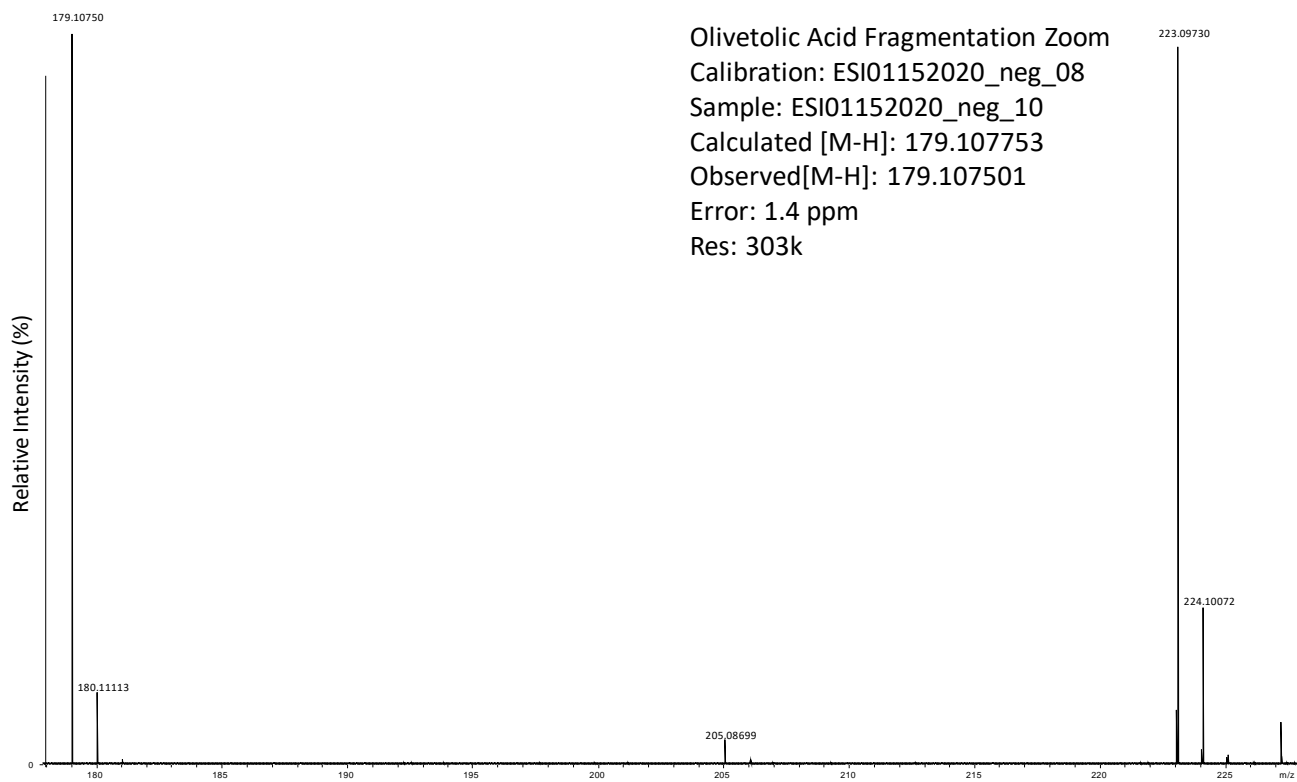

Supplement: MOESM2 [file 42003_2022_4202_MOESM2_ESM.pdf]
