# Supplementary material for: Biosynthesis of cannabinoid precursor olivetolic acid in genetically engineered Yarrowia lipolytica
Source: Commun Biol. 2022 Nov 12;5:1239. doi: 10.1038/s42003-022-04202-1 (PMC9653464; doi:10.1038/s42003-022-04202-1)
Supplement: Supplementary file 4 — Supplementary Data [file 42003_2022_4202_MOESM4_ESM.xlsx]

## Sheet: Figure 2b
Figure 2b	Time profiles of OLA titer in YL101 strain.
	Mean	SD	1	2	3
24h	0	0	0	0	0
48h	0.03	0	0.03	0.03	0.03
72h	0.097	0.015	0.08	0.1	0.11
96h	0.103	0.012	0.09	0.11	0.11

## Sheet: Figure 2c
Figure 2c	OLA production in engineered strains by expressing OLS and OAC or their fusions.
	Mean	SD	1	2	3
YL100	0	0	0	0	0
YL101	0.103	0.012	0.09	0.11	0.11
YL102	0.087	0.006	0.09	0.08	0.09
YL103	0.083	0.006	0.09	0.08	0.08

## Sheet: Figure 3a
Figure 3a	OLA titers in YL104 strain supplied with 0.5 mM, 1 mM, and 2 mM hexanoic acid at 24 h or 48 h.
	Mean	SD	1	2	3
0	0.1	0.01	0.11	0.09	0.1
0.5 at 24 h	0.06	0	0.06	0.06	0.06
1 at 24 h	0.053	0.006	0.05	0.05	0.06
2 at 24 h	0.047	0.006	0.05	0.04	0.05
0.5 at 48 h	0.123	0.006	0.12	0.13	0.12
1 at 48 h	0.1	0.01	0.09	0.11	0.1
2 at 48 h	0.077	0.006	0.08	0.07	0.08

## Sheet: Figure 3b
Figure 3b	Cell growth profile of YL104 strain fed with different dosages of HA at 24 h.
no addition of HA (0 mM)
	Mean	SD	1	2	3
24h	4.884	0.245	4.62	5.104	4.928
48h	12.203	0.685	12.848	12.276	11.484
72h	24.097	1.017	25.168	23.98	23.144
96h	26.327	1.075	27.5	26.092	25.388
adding 0.5 mM HA at 24h
	Mean	SD	1	2	3
24h	5.075	0.358	4.664	5.236	5.324
48h	7.113	0.198	6.908	7.128	7.304
72h	9.929	1.582	11.704	8.668	9.416
96h	10.34	1.035	11.352	9.284	10.384
adding 1 mM HA at 24h
	Mean	SD	1	2	3
24h	5.045	0.293	5.368	4.796	4.972
48h	6.028	0.308	6.38	5.808	5.896
72h	8.668	0.396	9.064	8.668	8.272
96h	8.961	0.333	9.196	9.108	8.58
adding 2 mM HA at 24h
	Mean	SD	1	2	3
24h	4.825	0.353	4.488	5.192	4.796
48h	5.559	0.269	5.324	5.852	5.5
72h	7.113	0.33	7.128	7.436	6.776
96h	7.245	0.286	7.26	7.524	6.952

## Sheet: Figure 3c
Figure 3c	Cell growth profile of YL104 strain fed with different dosages of HA at 48 h.
no addition of HA (0 mM)
	Mean	SD	1	2	3
24h	4.957	0.226	5.016	4.708	5.148
48h	12.335	0.309	12.628	12.012	12.364
72h	24.185	0.529	24.728	24.156	23.672
96h	27.045	0.858	27.896	27.06	26.18
adding 0.5 mM HA at 48h
	Mean	SD	1	2	3
24h	4.987	0.33	4.972	5.324	4.664
48h	11.469	0.33	11.132	11.792	11.484
72h	23.496	0.36	23.188	23.408	23.892
96h	25.989	1.098	27.236	25.564	25.168
adding 1 mM HA at 48h
	Mean	SD	1	2	3
24h	4.913	0.312	4.576	4.972	5.192
48h	8.125	0.265	8.096	7.876	8.404
72h	16.661	0.923	15.62	16.984	17.38
96h	17.307	0.97	16.236	17.556	18.128
adding 2 mM HA at 48h
	Mean	SD	1	2	3
24h	4.928	0.275	4.62	5.148	5.016
48h	7.04	0.245	6.776	7.26	7.084
72h	11.675	0.353	11.308	11.704	12.012
96h	12.012	0.49	11.484	12.1	12.452

## Sheet: Figure 4a
Figure 4a	OLA titers in engineered strains by expressing different hexanoyl-CoA synthetases for optimizing the conversion of hexanoic acid to hexanoyl-CoA.
	Mean	SD	1	2	3
YL104	0.123	0.006	0.12	0.13	0.12
YL105	0.103	0.012	0.11	0.09	0.11
YL106	0.097	0.015	0.08	0.11	0.1
YL107	0.077	0.006	0.07	0.08	0.08
YL108	0.077	0.006	0.08	0.07	0.08
YL109	0.1	0.01	0.09	0.11	0.1
YL110	1.04	0.03	1.01	1.07	1.04

## Sheet: Figure 4b
Figure 4b	OLA titers in engineered strains for enhancing the availability of malonyl-CoA.
	Mean	SD	1	2	3
YL113	0.823	0.015	0.82	0.84	0.81
YL114	0.197	0.015	0.18	0.21	0.2
YL115	1.857	0.04	1.9	1.85	1.82
YL116	1.077	0.045	1.03	1.12	1.08

## Sheet: Figure 5a
Figure 5a	OLA titers after controlling pH of the fermentation medium by using either PBS buffer or CaCO3.
	Mean	SD	1	2	3
PBS	1.113	0.035	1.11	1.08	1.15
CaCO3	5.8	0.06	5.74	5.86	5.8

## Sheet: Figure 5b
Figure 5b	OLA titers in strains with relevant genes integrated into different genomic loci cultivated in YPD or CSM-leu media.
	Mean	SD	1	2	3
YL117	3.107	0.142	2.98	3.26	3.08
YL120	2.883	0.1	2.99	2.87	2.79
YL118	3.49	0.05	3.54	3.44	3.49
YL121	3.067	0.07	3.08	2.99	3.13
YL119,YPD	3.387	0.075	3.31	3.39	3.46
YL119,CSM-leu	2.987	0.08	3	2.9	3.06

## Sheet: Figure 5c
Figure 5c	OLA titers in engineered strains by expressing different enzymes and their combinations for improving the supply of acetyl-CoA, ATP and NADPH.
	Mean	SD	1	2	3
YL122	4.797	0.102	4.91	4.77	4.71
YL123	4.173	0.065	4.11	4.17	4.24
YL124	4.817	0.146	4.84	4.66	4.95
YL125	7.187	0.245	7.19	6.94	7.43
YL126	5.993	0.226	6.01	6.21	5.76
YL127	8.083	0.156	8.23	7.92	8.1
YL128	8.93	0.241	8.91	9.18	8.7
